# Supplementary material for: Improving the Therapeutic Effect of Ultrasound Combined With Microbubbles on Muscular Tumor Xenografts With Appropriate Acoustic Pressure
Source: PubMed Central journal article supplement (PMC7373785; doi:10.3389/fphar.2020.01057), 2020-07-15
Supplement: DataSheet_1.pdf [file DataSheet_1.pdf]

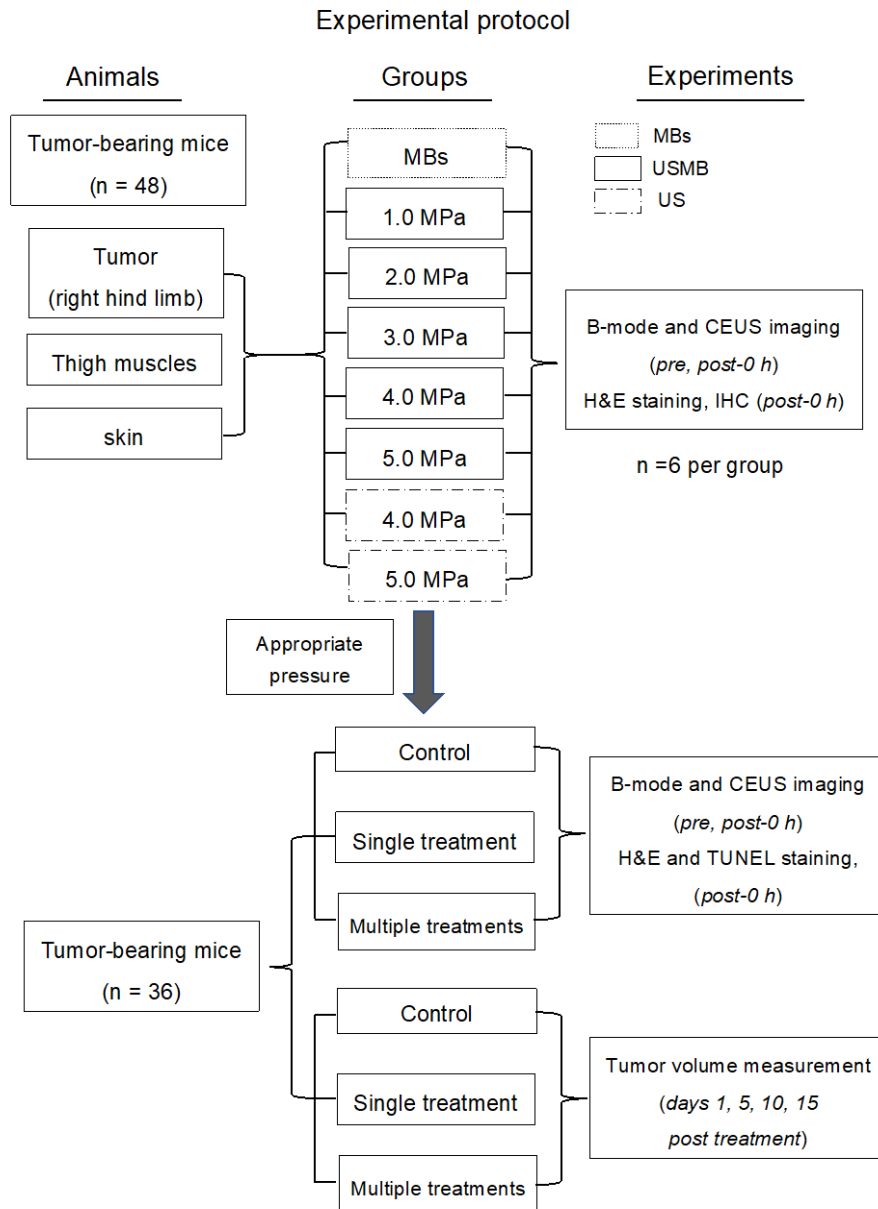

Figure S1. Illustration of the experimental protocol. H&E, hematoxylin and eosin. IHC, immunohistochemical. TUNEL, terminal deoxynucleotidyl transferase dUTP nick-end labeling.
